# Supplementary material
Source: PubMed Central journal article supplement (PMC3766494)
Supplement: NIHMS484442-supplement-supplementary_data.pdf [file NIHMS484442-supplement-supplementary_data.pdf]

**S1**

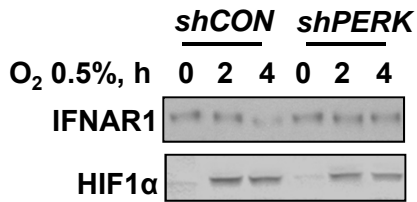

**Supplemental Figure S1.**

Immunoblotting analysis of the levels of IFNAR1 and HIF1α in WM266-4 cells transduced with indicated shRNA and incubated for indicated times in 0.5% O<sub>2</sub>.

**S2**

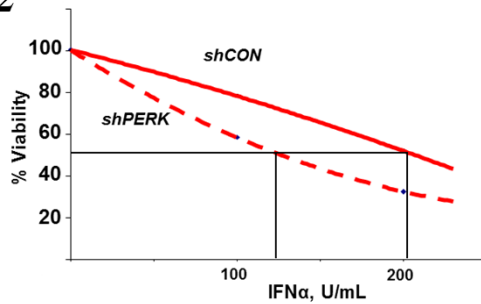

**Supplemental Figure S2.** WM266-4 cells transduced with the indicated shRNA and incubated hypoxic conditions (0.5% O<sub>2</sub>) for 4h were treated with the indicated doses of IFNα. Cell viability was assessed 24 h later. IC<sub>50</sub> for cells that received control shRNA was 207 U/mL and those that received PERK shRNA was 125 U/mL.

**S3**

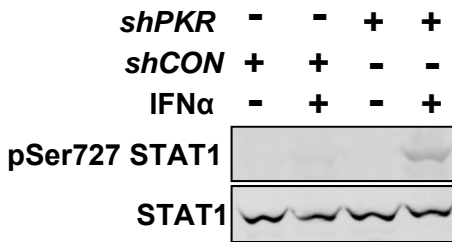

**Supplemental Figure S3.** Immunoblotting analysis of STAT1 levels and phosphorylation of STAT1 on Ser727 in T47D cells that received control or PKR shRNA 48 h prior to treatment with of IFNα (250 U/mL for 30 min).

**S4**

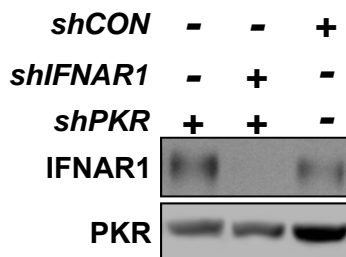

**Supplemental Figure S4.**

Immunoblotting analyses of IFNAR1 and PKR in the lysates from T47D cells that received the indicated shRNA.

**S5**

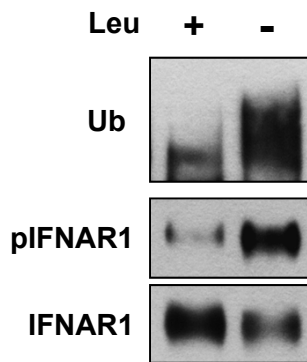

**Supplemental Figure S5.** Ubiquitination, phosphorylation and levels of IFNAR1 immunopurified from the lysates from 1205Lu cells (incubated in media with or without leucine) were analyzed by immunoblotting using indicated antibodies.

**S6**

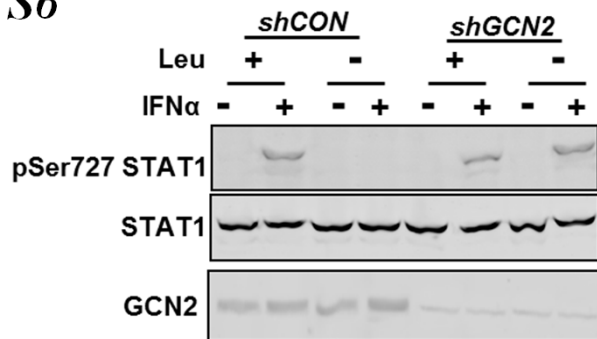

**Supplemental Figure S6.**

Phosphorylation of STAT1 on Ser727 and levels of STAT1 in WM266-4 cells that received the indicated shRNAs and were incubated in medium in the presence or absence of leucine for 48 h prior to treatment with IFN $\alpha$  (250 U/mL for 30 min). Levels of GCN2 are also shown.

**S7**

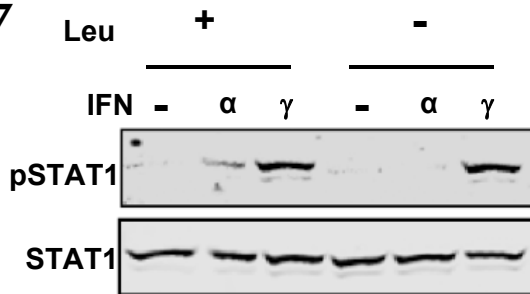

**Supplemental Figure S7.** 1205Lu cells were incubated in media lacking (or not) leucine for 48 h prior to treatment with either IFN $\alpha$  (250 U/mL) or IFN $\gamma$  (50 U/mL) for 30 min. Phosphorylation (Tyr701) and levels of STAT1 were analyzed by immunoblotting using indicated antibodies.

**S8**

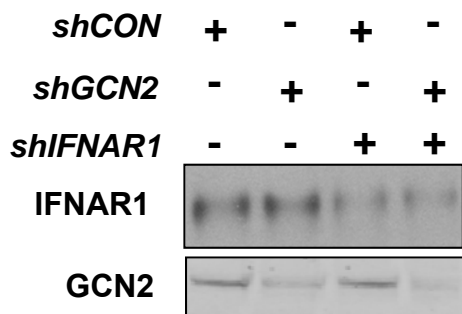

**Supplemental Figure S8.** Levels of IFNAR1 and GCN2 in WM266-4 cells that received the indicated shRNAs were analyzed by immunoblotting.
